# Supplementary material for: An improved dynamic bidirectional coupled hydrologic–hydrodynamic model for efficient flood inundation prediction
Source: Copernicus journal article supplement (doi:10.5194/nhess-24-2315-2024), 2024-07-09
Supplement: Supplementary file 1 [file nhess-24-2315-2024-supplement.pdf]

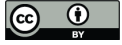

*Supplement of*

## **An improved dynamic bidirectional coupled hydrologic–hydrodynamic model for efficient flood inundation prediction**

**Yanxia Shen et al.**

*Correspondence to:* Chunbo Jiang ([jcb@tsinghua.edu.cn](mailto:jcb@tsinghua.edu.cn))

The copyright of individual parts of the supplement might differ from the article licence.

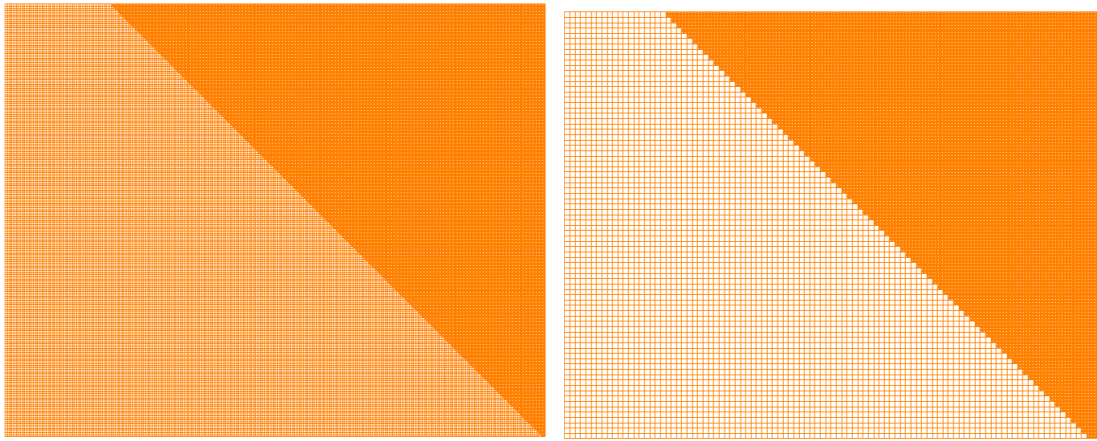

(a)

(b)

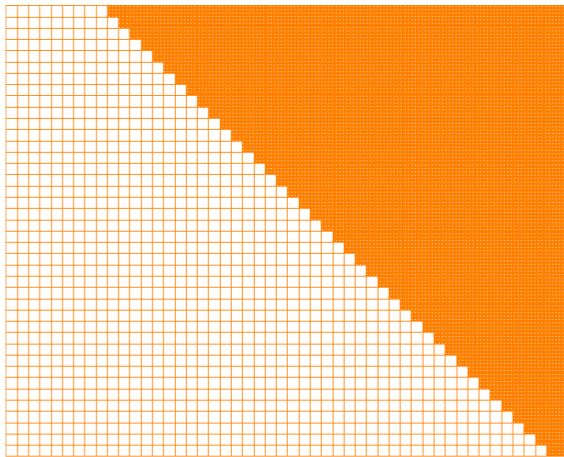

(c)

Figure S1 Grid partition of the cases described in Section 3.1: (a) case12, (b) case15  
and (c) case10

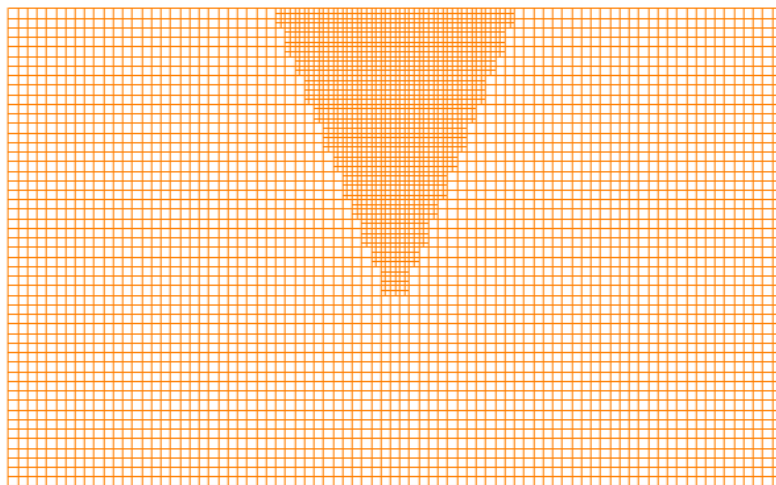

Figure S2 Grid partition of the example described in Section 3.2

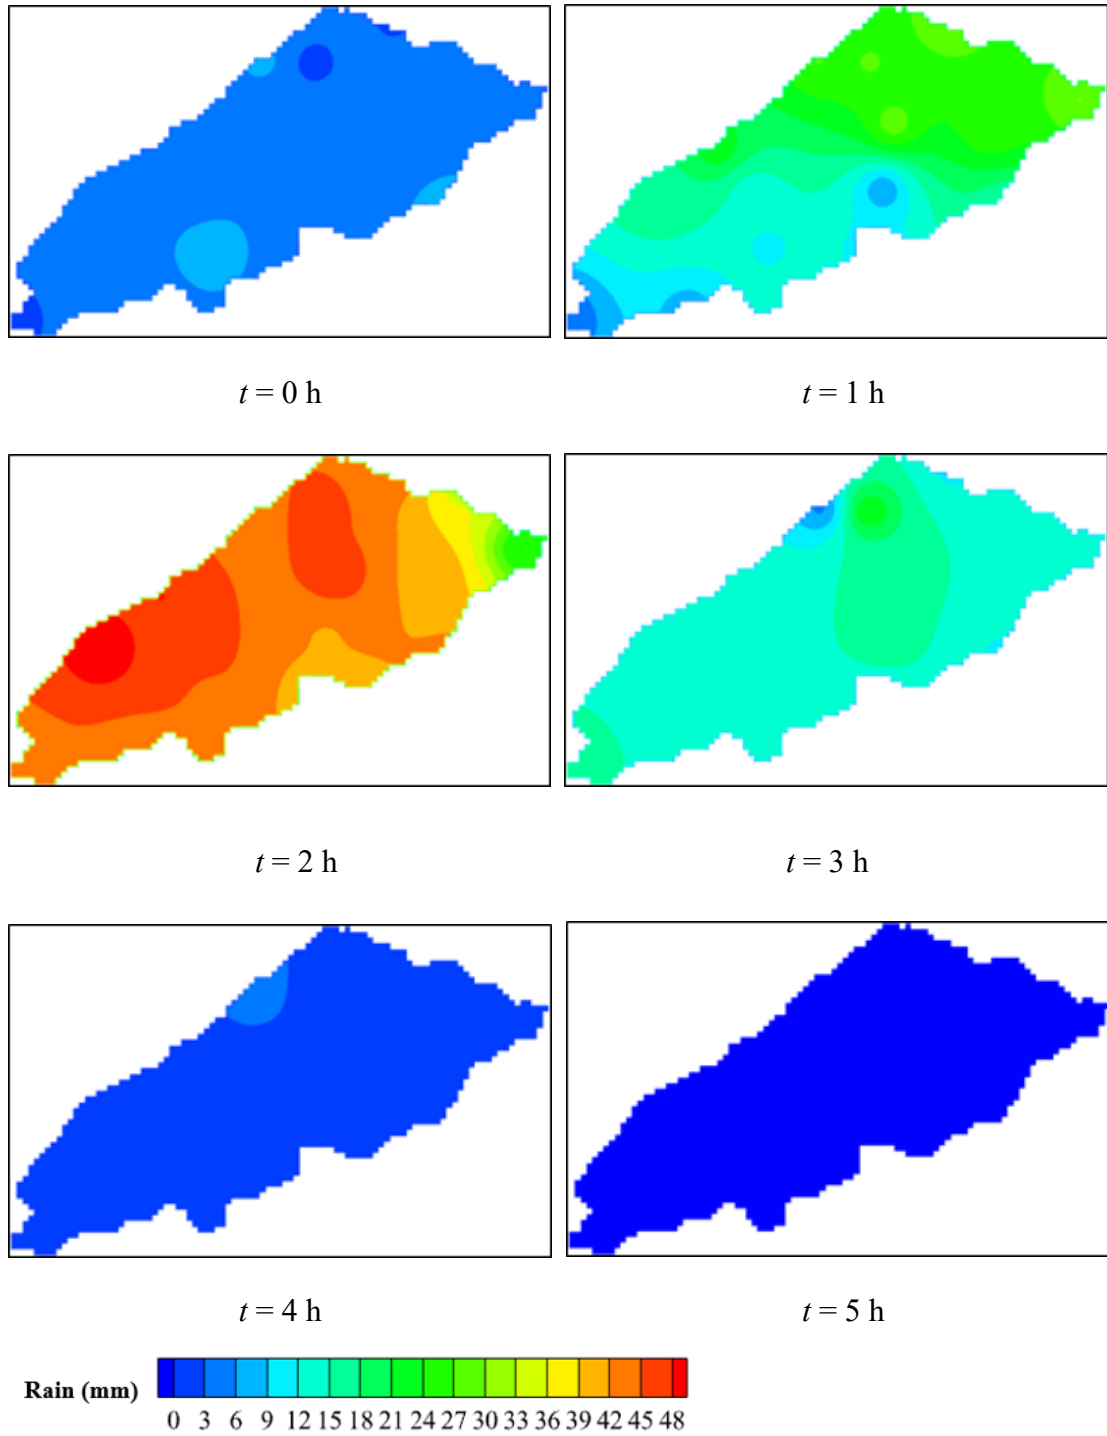

Figure S3 Spatially distribution of rainfall at different times in the Goodwin watershed

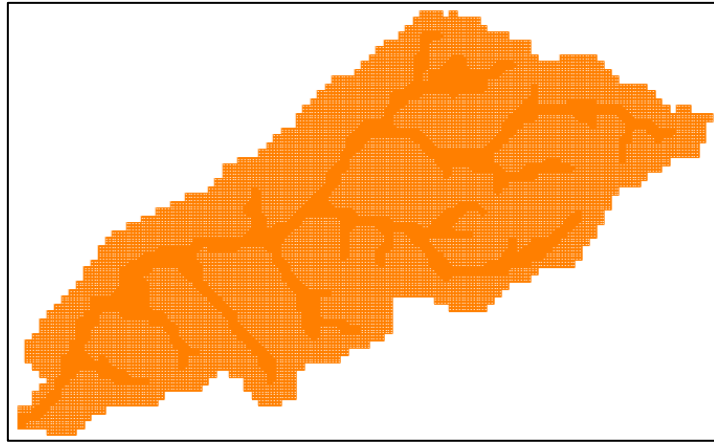

(a)

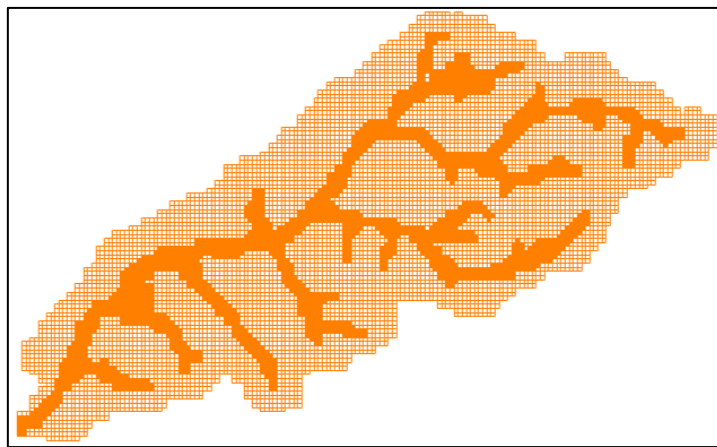

(b)

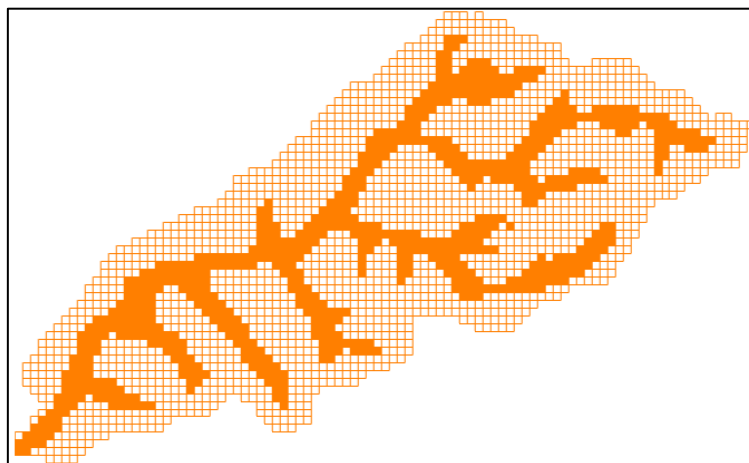

(c)

Figure S4 Grid partition of the Goodwin Basin: (a) case12, (b) case15 and (c) case10

Table S1 Locations of six stations in Goodwin Creek Watershed

| Stations | Longitude and latitude |               | UTM projection |            |
|----------|------------------------|---------------|----------------|------------|
|          | Latitude (N)           | Longitude (W) | X              | Y          |
| P1       | 34.23                  | 89.91         | 231568.71      | 3791553.74 |
| P4       | 34.26                  | 89.87         | 235367.35      | 3794280.52 |
| P6       | 34.27                  | 89.86         | 236459.33      | 3795732.93 |
| P7       | 34.25                  | 89.86         | 236662.95      | 3793699.88 |
| P8       | 34.27                  | 89.84         | 238577.96      | 3795483.81 |
| P14      | 34.25                  | 89.88         | 234644.40      | 3793655.02 |
